# Supplementary material for: NeutrobodyPlex—monitoring SARS‐CoV‐2 neutralizing immune responses using nanobodies
Source: PubMed Central journal article supplement (PMC8097376; doi:10.15252/embr.202052325), 2021-04-27
Supplement: EMBR-22-e52325-s002.pdf [file EMBR-22-e52325-s002.pdf]

1 **Appendix:**

2 **NeutrobodyPlex - monitoring SARS-CoV-2 neutralizing immune responses using nanobodies**

3

4 *Teresa R. Wagner<sup>1,2\*</sup>, Elena Ostertag<sup>3\*</sup>; Philipp D. Kaiser<sup>2</sup>, Marius Gramlich<sup>2</sup>, Natalia Ruetalo<sup>4</sup>,*  
5 *Daniel Junker<sup>2</sup>, Julia Haering<sup>2</sup>, Bjoern Traenkle<sup>2</sup>, Matthias Becker<sup>2</sup>, Alex Dulovic<sup>2</sup>, Helen*  
6 *Schweizer<sup>5</sup>, Stefan Nueske<sup>5</sup>, Armin Scholz<sup>5</sup>, Anne Zeck<sup>2</sup>, Katja Schenke-Layland<sup>2,6,7,8</sup>, Annika*  
7 *Nelde<sup>6,9,10</sup>, Monika Strengert<sup>12,13</sup>, Juliane S. Walz<sup>6,9,10,11</sup>, Georg Zocher<sup>3</sup>, Thilo Stehle<sup>3,14</sup>,*  
8 *Michael Schindler<sup>4</sup>, Nicole Schneiderhan-Marra<sup>2</sup> and Ulrich Rothbauer<sup>1,2,6#</sup>*

9

10 Addresses

11 <sup>1</sup> Pharmaceutical Biotechnology, Eberhard Karls University, Tuebingen, Germany

12 <sup>2</sup> Natural and Medical Sciences Institute at the University of Tuebingen, Reutlingen, Germany

13 <sup>3</sup> Interfaculty Institute of Biochemistry, Eberhard Karls University, Tuebingen, Germany

14 <sup>4</sup> Institute for Medical Virology and Epidemiology of Viral Diseases, University Hospital  
15 Tuebingen, Tuebingen, Germany

16 <sup>5</sup> Livestock Center of the Faculty of Veterinary Medicine, Ludwig Maximilians University,  
17 Oberschleissheim, Germany

18 <sup>6</sup> Cluster of Excellence iFIT (EXC2180) "Image-Guided and Functionally Instructed Tumor  
19 Therapies", Eberhard Karls University, Tuebingen, Germany

20 <sup>7</sup> Department of Women's Health, Research Institute for Women's Health, Eberhard Karls  
21 University, Tuebingen, Germany

22 <sup>8</sup> Department of Medicine/Cardiology, Cardiovascular Research Laboratories, David Geffen  
23 School of Medicine at UCLA, Los Angeles, CA, USA

24 <sup>9</sup> Clinical Collaboration Unit Translational Immunology, German Cancer Consortium (DKTK),  
25 Department of Internal Medicine, University Hospital Tuebingen, Tuebingen, Germany

26 <sup>10</sup> Institute for Cell Biology, Department of Immunology, Eberhard Karls University, Tuebingen,  
27 Germany

28 <sup>11</sup> Dr. Margarete Fischer-Bosch Institute of Clinical Pharmacology and Robert Bosch Center  
29 for Tumor Disease, RBCT, Stuttgart, Germany

30 <sup>12</sup> Department of Epidemiology, Helmholtz Centre for Infection Research, Braunschweig,  
31 Germany

32 <sup>13</sup> TWINCORE GmbH, Centre for Experimental and Clinical Infection Research, a joint venture  
33 of the Hannover Medical School and the Helmholtz Centre for Infection Research, Hannover,  
34 Germany

35 <sup>14</sup> Vanderbilt University School of Medicine, Nashville, TN, USA

36

37 \* both authors contributed equally to this work

38 # corresponding author

39

40 Correspondence:

41 Prof. Dr. Ulrich Rothbauer, Natural and Medical Sciences Institute at the University of  
42 Tuebingen

43 Markwiesenstr. 55, 72770 Reutlingen, Germany.

44 E-mail: ulrich.rothbauer@uni-tuebingen.de

45 Phone: +49 7121 51530-415

46 Fax: +49 7121 51530-816

47 Orcid ID: 0000-0001-5923-8986

48

|    |                                                                                          |           |
|----|------------------------------------------------------------------------------------------|-----------|
| 49 | <b>Table of Content</b>                                                                  |           |
| 50 |                                                                                          |           |
| 51 | <b>Appendix Figures</b> .....                                                            | <b>4</b>  |
| 52 | Appendix Figure S1 - Affinities of Nbs determined by biolayer interferometry. ....       | 4         |
| 53 | Appendix Figure S2 - Selected Nbs neutralize SARS-CoV-2 infection. ....                  | 5         |
| 54 | Appendix Figure S3 - Epitope binning of Nbs by biolayer interferometry. ....             | 6         |
| 55 | Appendix Figure S4 - Differential HDX and sequence coverage of RBD upon Nb binding. .... | 9         |
| 56 | Appendix Figure S5 - NM1230 binding onto a spike in 'up/down/down' conformation and      |           |
| 57 | mapping of RBD:NM1230 interaction sites.....                                             | 10        |
| 58 | Appendix Figure S6- Influence of RBD mutations on NM1226 and NM1230 binding.....         | 12        |
| 59 | Appendix Figure S7 – Affinities of Nbs against mutated versions of RBD derived from      |           |
| 60 | B.1.1.7 and B.1.351.....                                                                 | 13        |
| 61 | Appendix Figure S8 – Biparatopic NM1267 displaces neutralizing IgG binding the           |           |
| 62 | RBD:ACE2 interaction site.....                                                           | 14        |
| 63 | <b>Appendix Tables</b> .....                                                             | <b>15</b> |
| 64 | Appendix Table S1 – Amino acid sequences of RBD-specific Nbs.....                        | 15        |
| 65 | Appendix Table S2 – Data collection and refinement statistics for the RBD:NM1226 and     |           |
| 66 | RBD:NM1230 complex structures. ....                                                      | 16        |
| 67 | Appendix Table S3 - NeutrobodyPlex data illustrated in Fig 5B, C. ....                   | 17        |
| 68 | Appendix Table S4 - Data of control samples (C1-C4) from healthy donors tested in the    |           |
| 69 | NeutrobodyPlex and viral infection assay.....                                            | 19        |
| 70 | <b>References</b> .....                                                                  | <b>20</b> |
| 71 |                                                                                          |           |
| 72 |                                                                                          |           |
| 73 |                                                                                          |           |

74 **Appendix Figures**

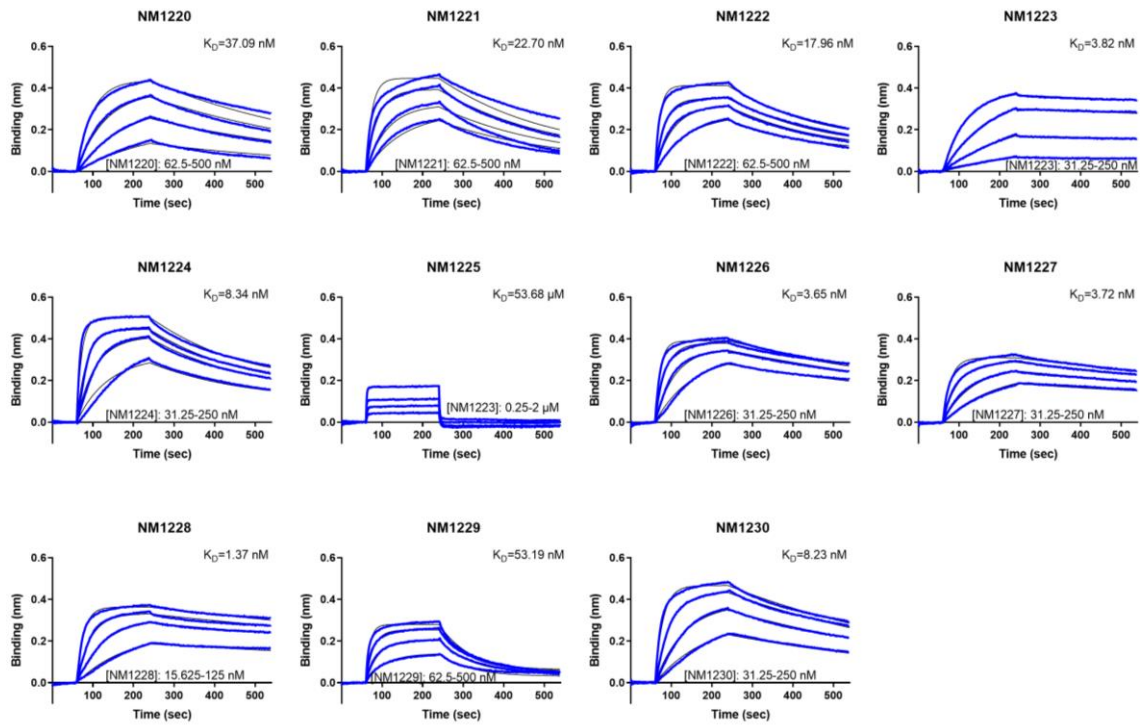

75  
76

77 **Appendix Figure S1 - Affinities of Nbs determined by biolayer interferometry.**

78 Sensograms of BLI-based affinity measurements of 11 identified RBD-specific Nbs are shown.

79 Biotinylated RBD was immobilized on streptavidin biosensors and kinetic measurements were

80 performed by using four concentrations of purified Nbs ranging from 15.6 nM - 2 μM.

81

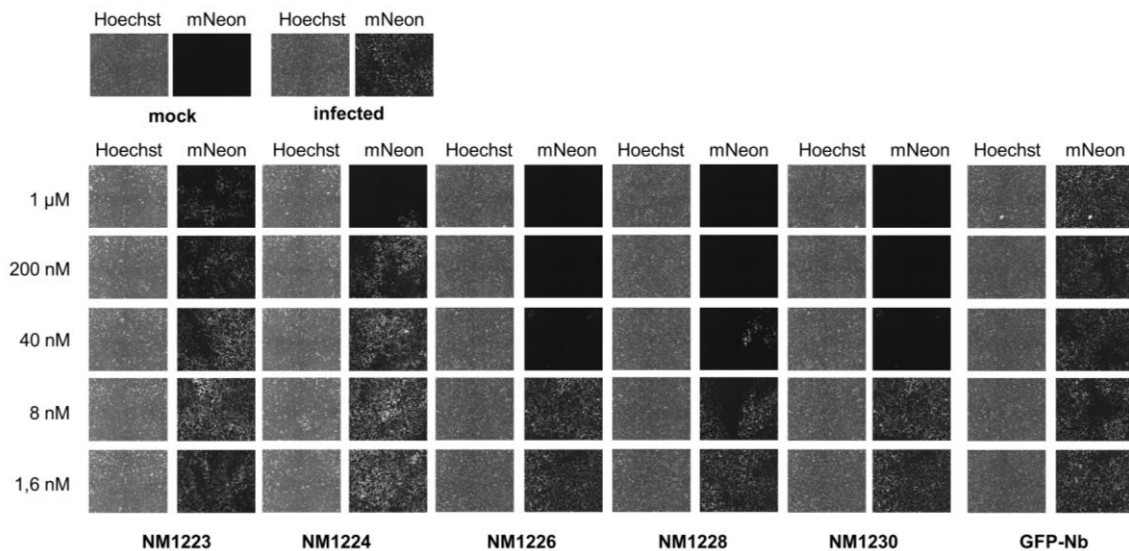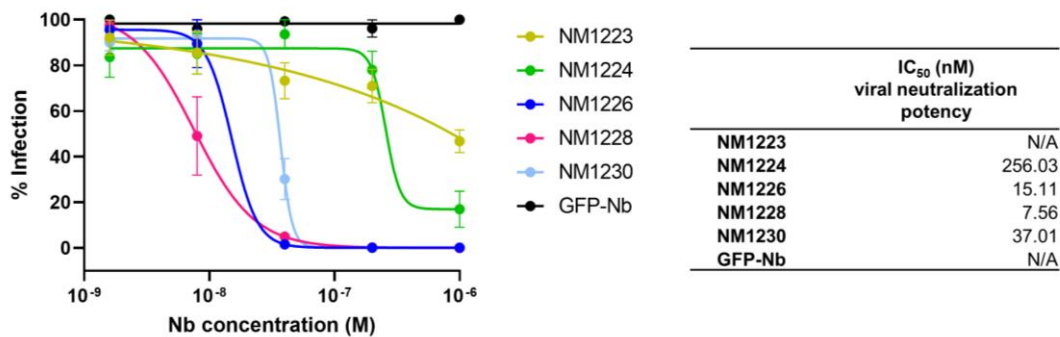

82  
83  
84  
85  
86  
87  
88  
89  
90  
91  
92

**Appendix Figure S2 - Selected Nbs neutralize SARS-CoV-2 infection.**

Neutralization potency of NM1223, NM1224, NM1226, NM1228 and NM1230 was analyzed in Caco-2 cells using the SARS-CoV-2-mNG strain. As negative control, the GFP-Nb was used. Representative images of human Caco-2 cells upon infection with SARS-CoV-2 expressing mNeonGreen either in presence or absence of serial dilutions of RBD Nbs are shown. Infection rate normalized to virus-only infection control is illustrated as percent of infection (% Infection). IC<sub>50</sub> value was calculated from a four-parametric sigmoidal model and data are presented as mean ± s.e.m. of three biological replicates (n = 3).

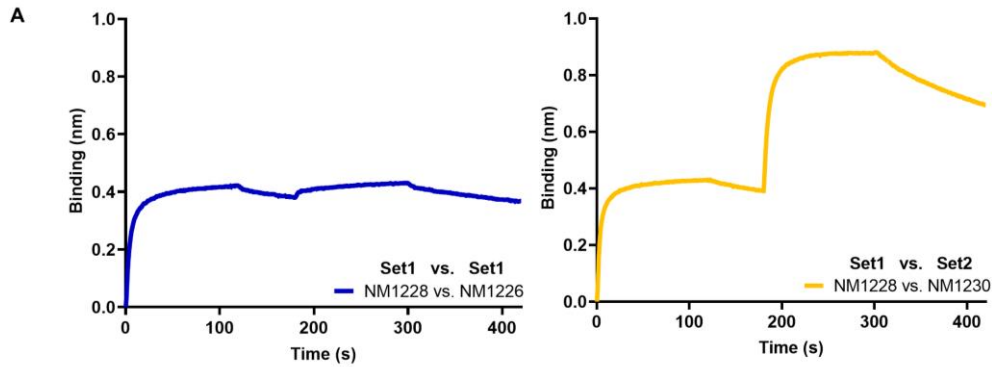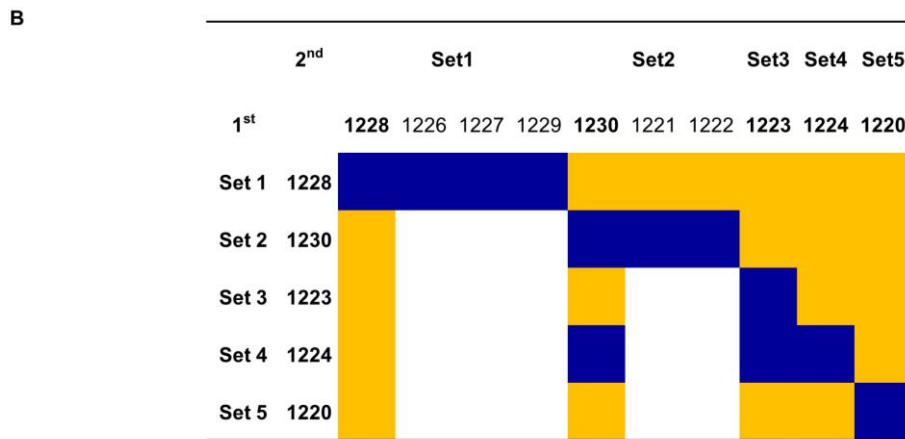

93  
94

95 **Appendix Figure S3 - Epitope binning of Nbs by biolayer interferometry.**

96 **A** Representative sensograms of single measurements of Nbs affiliated to the same Nb-Set  
97 (NM1228/ NM1226, blue) and two different Nb-Sets (NM1228/ NM1230, orange) are shown.

98 **B** Heat map illustration of competitive Nb epitope binning on RBD using BLI. Rows and  
99 columns represent the loading of the first and second Nb, respectively. Blue colored squares  
100 illustrate no additional binding of the second Nb meaning both Nbs belong to the same Nb-  
101 Set. Orange colored squares represent additional binding of the second Nb, hence these Nbs  
102 belong to different Nb-Sets.

103

**A**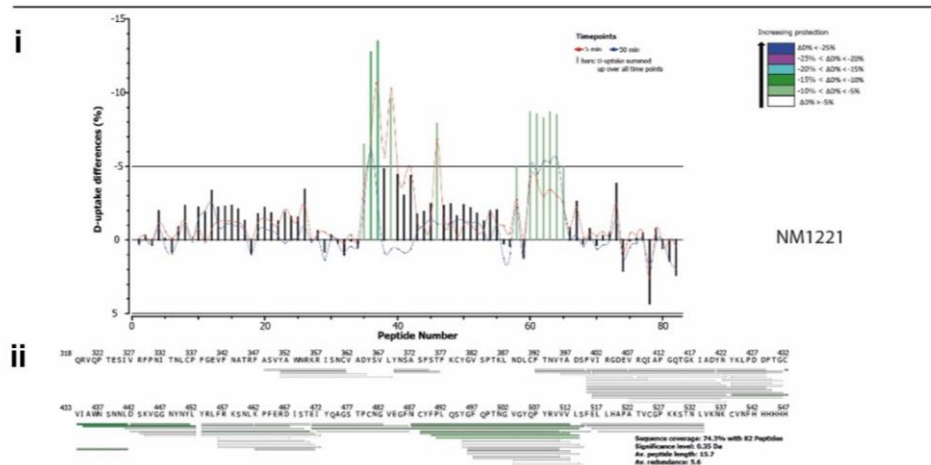**B**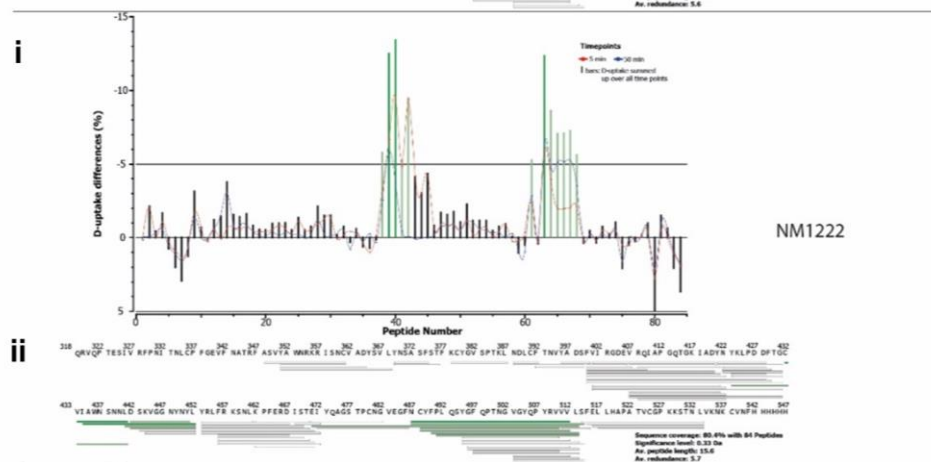**C**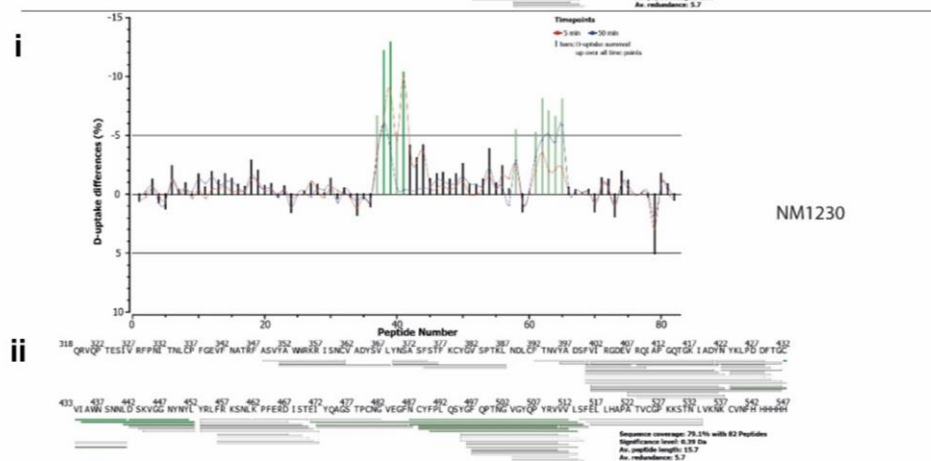

D

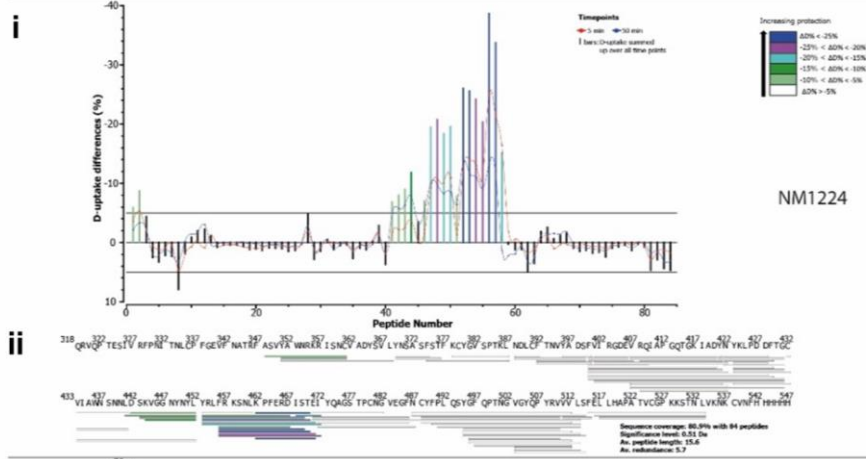

E

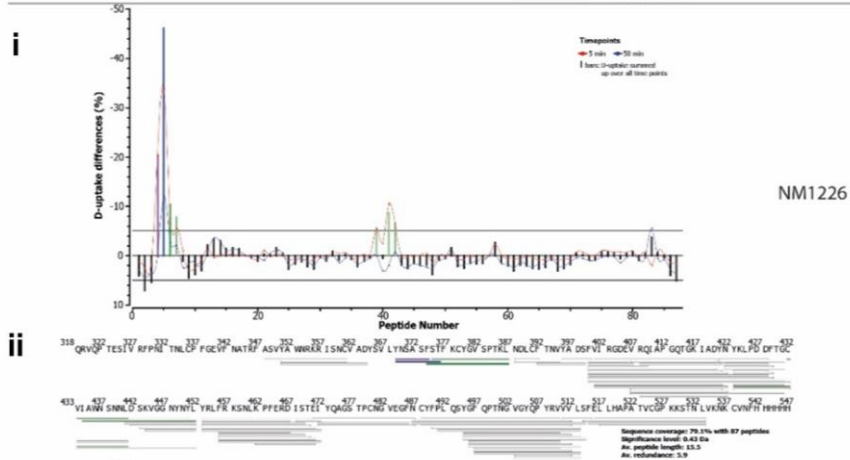

F

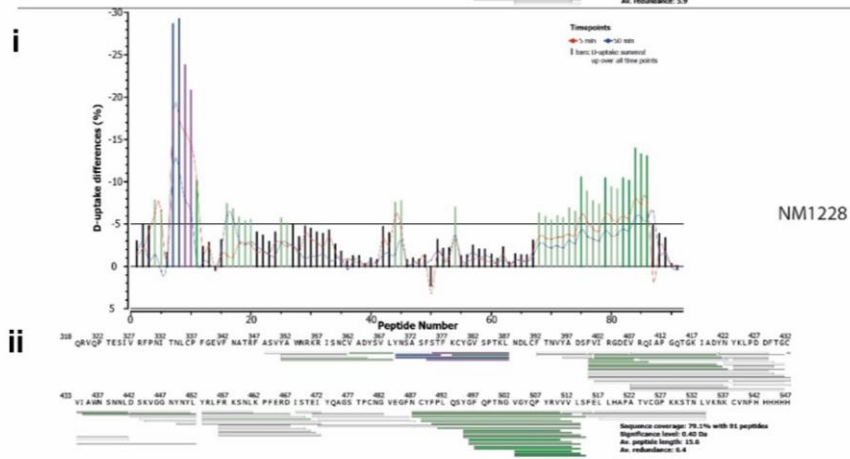



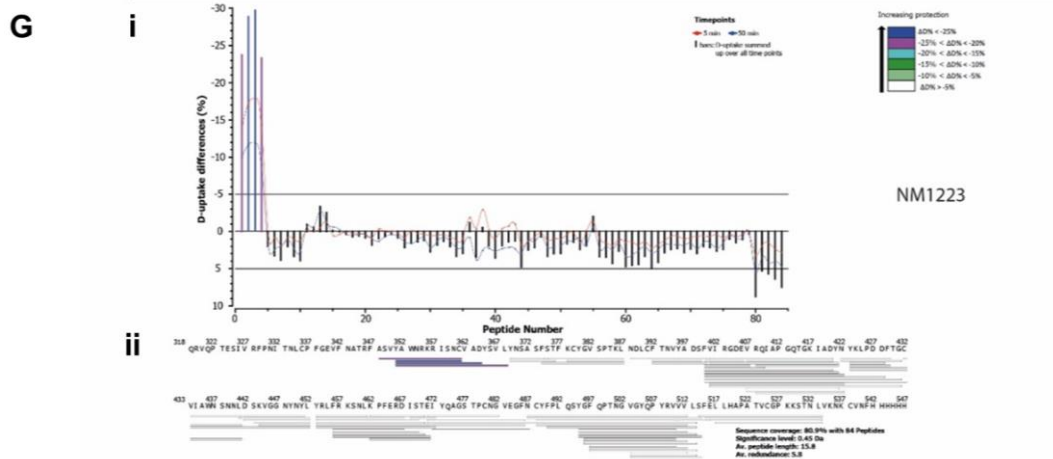

106  
107 **Appendix Figure S4 - Differential HDX and sequence coverage of RBD upon Nb**

108 **binding.**

109 **A NM1221**

110 **B NM1222**

111 **C NM1230**

112 **D NM1224**

113 **E NM1226**

114 **F NM1228**

115 **G NM1223**

116 **i** Residual differential HDX of partially overlapping peptic peptides numbered from the N- to  
117 the C-terminus and from short to long peptides. The minimum significant deuterium uptake  
118 difference (significance level) was calculated by HDEaminer from the variance of triplicate  
119 runs. On this basis, a minimum threshold of 3% deuterium difference was used to define  
120 regions as unprotected upon Nb binding. Peptides showing higher protection than 5% were  
121 considered as protected and corresponding bars were color-coded according to the legend.

122 **ii** Sequence coverage map of peptides validated for HDX data analysis for each nanobody-  
123 RBD pair. Peptides above the 5% protection threshold were color-coded using the colors from  
124 (i).

125

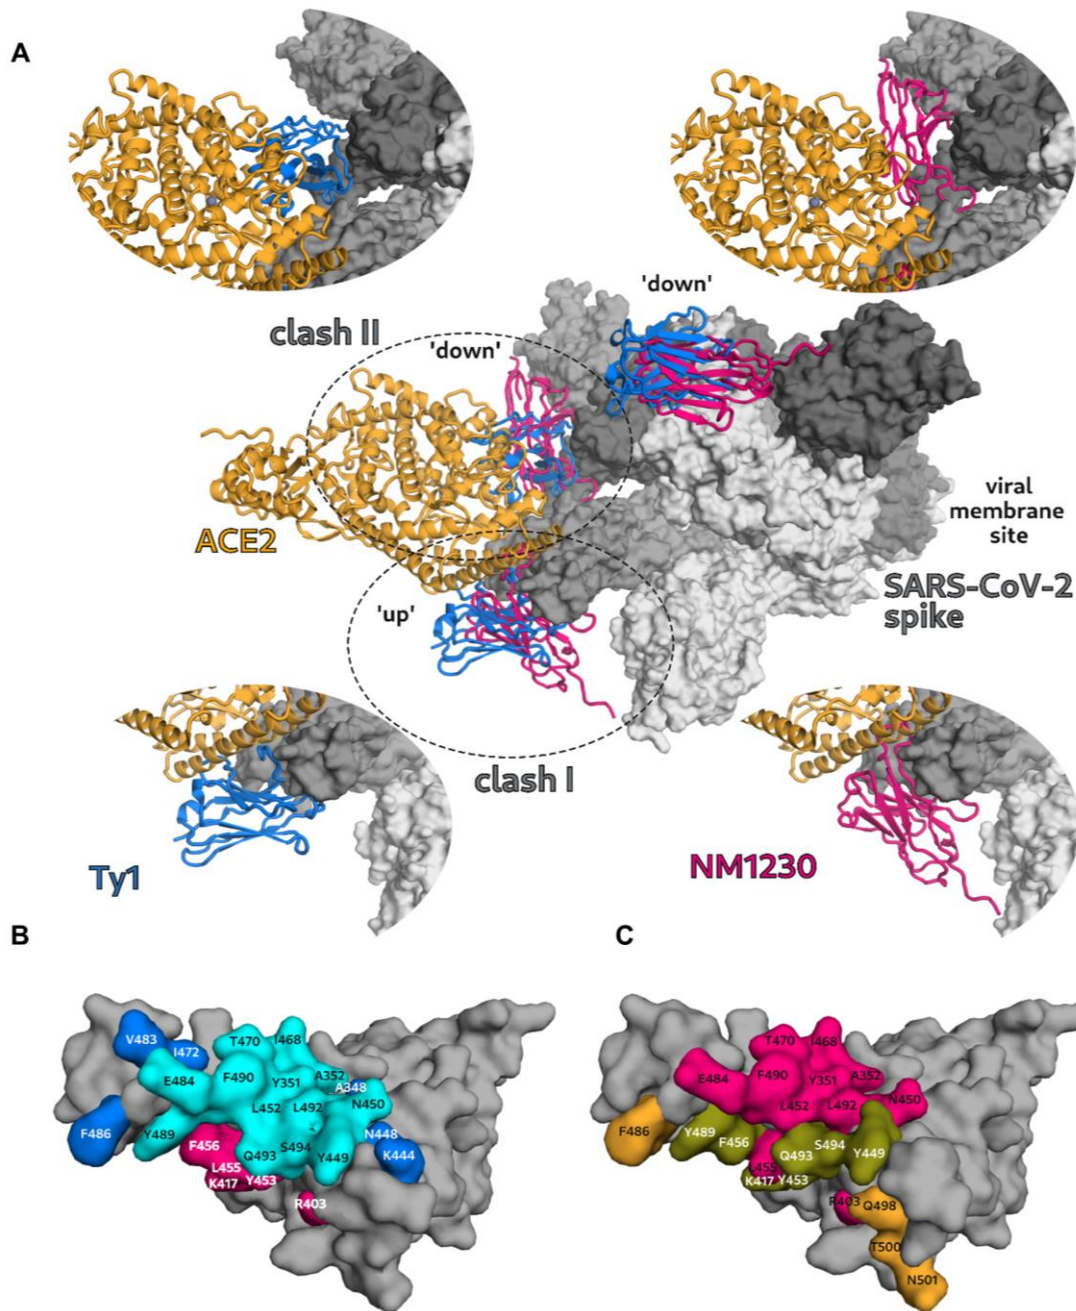

126  
127

128 **Appendix Figure S5 - NM1230 binding onto a spike in 'up/down/down' conformation**  
129 **and mapping of RBD:NM1230 interaction sites.**

130 **A** Alignment of the SARS-CoV-2 spike:Ty1-Nb (blue) cryoEM structure (pdb code: 6ZXN)  
131 (Hanke *et al*, 2020) with the RBD:NM1230 complex. The ACE2 (orange) (pdb code: 6M17)  
132 and the NM1230 (pink) and Ty1-Nb (blue) are depicted as cartoons, whereas the spike trimer  
133 is shown in surface representation (grey). The neutralizing effect of NM1230 and Ty1-Nb is  
134 shown by expected collisions (clash I and clash II) with ACE2 in the alignment. Additional

135 close-up views of the individual Nb positions are shown to highlight the differences in Nb  
136 binding and ACE2 blocking.

137 **B** Individual binding sites of NM1230 (pink) and the Ty1-Nb (blue) (Hanke *et al.*, 2020) as well  
138 as common interaction residues (cyan) are highlighted on the surface representation of RBD.

139 **C** Comparison of the ACE2 interaction site and NM1230 epitope on RBD. Common residues  
140 are shown in olive, whereas residues exclusively in contact with ACE2 and NM1230 are  
141 colored in orange and pink, respectively. All interactions of NM1230, Ty1-Nb and ACE2 are  
142 depicted using a distance cut-off of  $< 4 \text{ \AA}$  to the surface of RBD.

143

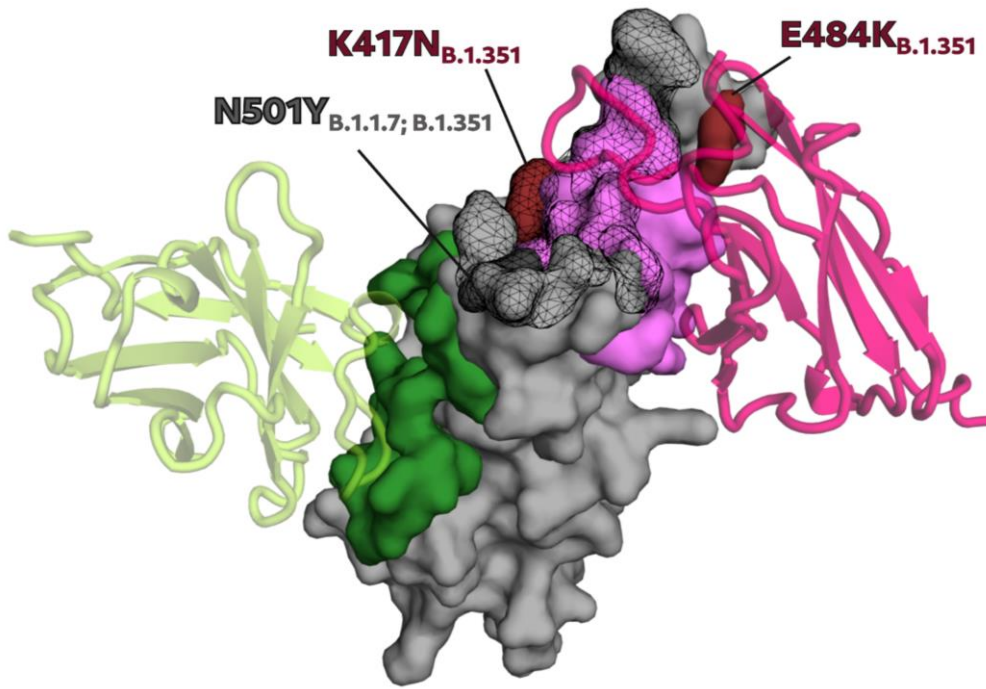

| Virus Strain           | RBD Mutation        |
|------------------------|---------------------|
| B.1.1.7 (UK)           | N501Y               |
| B.1.351 (South Africa) | N501Y, E484K, K417N |

144  
145  
146

**Appendix Figure S6- Influence of RBD mutations on NM1226 and NM1230 binding.**

147 NM1226 (light green) and NM1230 (magenta) are shown as cartoon with their corresponding  
148 binding epitopes on the RBD (surface representation) surface in dark green and light pink,  
149 respectively. Mutations on the RBD and in the binding epitope of NM1230, discovered in  
150 B.1.1.7 (United Kingdom) and B.1.351 (South Africa) SARS-CoV-2 strains, are highlighted in  
151 dark grey and dark red, respectively. In addition, the ACE2 interaction site on RBD is indicated  
152 as black mesh.

153

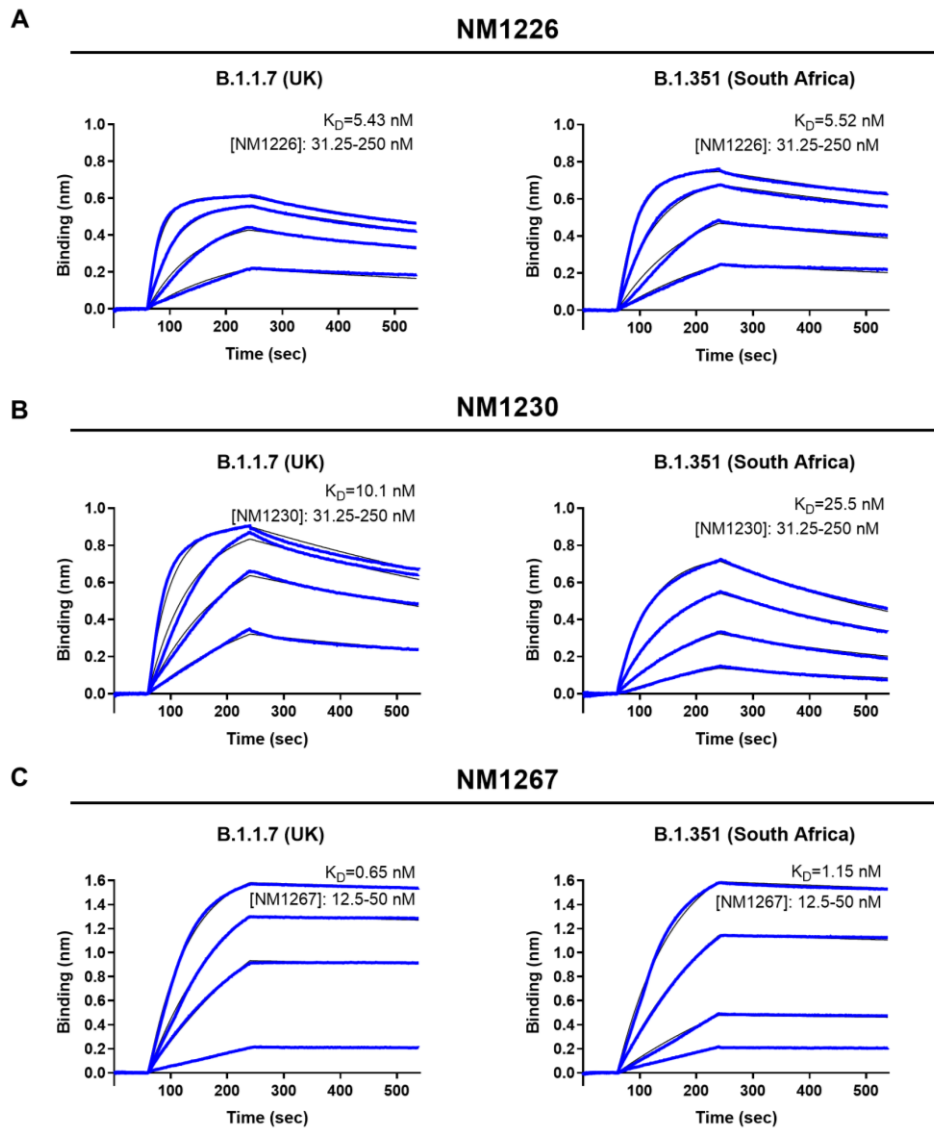

154  
 155  
 156  
 157  
 158  
 159  
 160  
 161  
 162  
 163  
 164  
 165

**Appendix Figure S7 – Affinities of Nbs against mutated versions of RBD derived from B.1.1.7 and B.1.351.**

Sensograms of BLI-based affinity measurements of selected RBD-specific Nbs are shown. Biotinylated RBD mutants derived from B.1.1.7 (UK) or B.1.351 (South Africa) were immobilized on streptavidin biosensors and kinetic measurements were performed by using four concentrations of purified Nbs ranging from 12.5 nM – 250 nM.

**A** NM1226  
**B** NM1230  
**C** NM1267

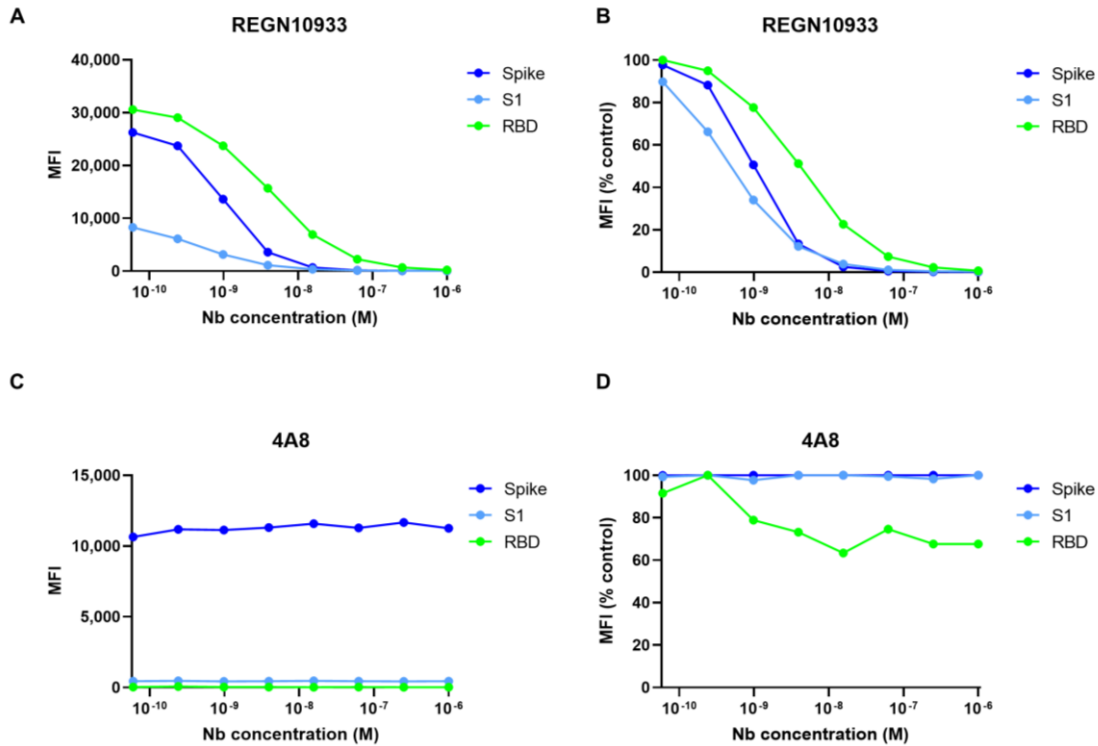

166  
167

168 **Appendix Figure S8 – Biparotopic NM1267 displaces neutralizing IgG binding the**  
169 **RBD:ACE2 interaction site.**

170 Antigen-coated beads comprising RBD, S1 or spike were co-incubated with purified IgGs and  
171 a dilution series of NM1267 (1  $\mu$ M to 6 pM). Mean fluorescent intensities (MFI) derived from  
172 antigen-bound IgGs in the presence of bipNb and MFIs normalized to the MFI values of IgG-  
173 only samples ((MFI (% control))) are illustrated.

174 **A, B** Anti-Spike RBD IgG clone REGN10933 (Hansen *et al*, 2020).

175 **C, D** Anti-Spike NTD IgG clone 4A8 (Chi *et al*, 2020)

176

177 **Appendix Tables**

178 **Appendix Table S1 – Amino acid sequences of RBD-specific Nbs.**

| <b>RBD-specific Nb</b> | <b>Amino Acid Sequence</b>                                                                                                                                                                                                                                                                                                                                                                                                                                                                                                                                                                                 |
|------------------------|------------------------------------------------------------------------------------------------------------------------------------------------------------------------------------------------------------------------------------------------------------------------------------------------------------------------------------------------------------------------------------------------------------------------------------------------------------------------------------------------------------------------------------------------------------------------------------------------------------|
| <b>NM1220</b>          | QVQLVESGGGLVQPGE <span style="text-decoration: underline;">SL</span> RLSCVAYGNMLRGYVVGWYRQAPGKQREL <span style="text-decoration: underline;">VAG</span> IDTSGEKKKYADA<br>VKGRFTISRDNAGNTVYLQMN <span style="text-decoration: underline;">SL</span> KPEDTAVYYCNADAPWPPRPYSVIGTRTGYWGRGSPVTVSS                                                                                                                                                                                                                                                                                                               |
| <b>NM1221</b>          | DVQLVESGGGLVQP <span style="text-decoration: underline;">G</span> SLTLSCVGS <span style="text-decoration: underline;">G</span> FLFSGYAMNWYRQAPGKALELVAGISNAGDITHYEEAM<br>KGRVAISR <span style="text-decoration: underline;">V</span> NDKNTVYLQMD <span style="text-decoration: underline;">L</span> KPEDTAVYRCHAPGVRV <span style="text-decoration: underline;">A</span> SGERNDVWGQGTQVTVSS                                                                                                                                                                                                                |
| <b>NM1222</b>          | EVQLVESGGGLV <span style="text-decoration: underline;">R</span> PG <span style="text-decoration: underline;">S</span> LR <span style="text-decoration: underline;">L</span> SCVGS <span style="text-decoration: underline;">G</span> FTFSGYAINWYRQAPGKALELVAGISNAGDLTHYEEAM<br>KGRVAISR <span style="text-decoration: underline;">A</span> NDKNTVYLQMD <span style="text-decoration: underline;">L</span> KPEDTAVYRCHAPGVRV <span style="text-decoration: underline;">G</span> TGERNDVWGQGAQVTVSS                                                                                                          |
| <b>NM1223</b>          | EVQLVESGGGLVQP <span style="text-decoration: underline;">G</span> SLRLSCSAS <span style="text-decoration: underline;">G</span> FAFSSVMSWVRL <span style="text-decoration: underline;">L</span> PGKGT <span style="text-decoration: underline;">E</span> WVAEIDRDGGNGNYEDS<br>VKGRFTISRDN <span style="text-decoration: underline;">A</span> KNTLFLQMN <span style="text-decoration: underline;">S</span> LPEDTALYYCRLGTRDHIMSGW <span style="text-decoration: underline;">G</span> PGAPVTVSS                                                                                                               |
| <b>NM1224</b>          | DVQLVESGGSLVQP <span style="text-decoration: underline;">G</span> SLRLSC <span style="text-decoration: underline;">E</span> TSR <span style="text-decoration: underline;">S</span> SLD <span style="text-decoration: underline;">Y</span> AIGWFRQAPGKEREGVASIS <span style="text-decoration: underline;">S</span> SMRTEYADSV<br>KGRFTISRDN <span style="text-decoration: underline;">A</span> KNTAYLDMN <span style="text-decoration: underline;">S</span> LKPEDTAVYYCAAAGEYGRAWPGLDWYEF <span style="text-decoration: underline;">E</span> YEGPGSPVTVSS                                                   |
| <b>NM1225</b>          | QVQLVESGGGLVQP <span style="text-decoration: underline;">G</span> SLRLSCAAS <span style="text-decoration: underline;">N</span> ILRVHDMGWYRQAPGKQREYVAMITHGGITNYIDS <span style="text-decoration: underline;">V</span> K<br>GRFTISRDN <span style="text-decoration: underline;">A</span> KNTVYLQMN <span style="text-decoration: underline;">S</span> LKPEDTAVYYCHAVLSSALNGVTETSSNWGQGTQVTVSS                                                                                                                                                                                                               |
| <b>NM1226</b>          | QVQLVESGGGSVQP <span style="text-decoration: underline;">G</span> SLRLSCLGSG <span style="text-decoration: underline;">L</span> DYYAIGWFRQAPGKEREGVSCIASSGDRTIYADSVK<br>GRFTISR <span style="text-decoration: underline;">D</span> YGKNTVYLQMN <span style="text-decoration: underline;">S</span> LKPEDTAMYYCAALQGSYYTGFVANEYDYWGQGA <span style="text-decoration: underline;">P</span> VTVSS                                                                                                                                                                                                              |
| <b>NM1227</b>          | EVQLVESGGGLVQP <span style="text-decoration: underline;">G</span> SLTLSC <span style="text-decoration: underline;">E</span> TSGRHFDIDDMGWYRQAPGKQREL <span style="text-decoration: underline;">V</span> ACITTESSTTYADAVK<br>GRFTISR <span style="text-decoration: underline;">D</span> NP <span style="text-decoration: underline;">D</span> NTVYLQMTN <span style="text-decoration: underline;">L</span> KPEDTAVYYCNAEMHPRSLDYALGNRDYWGQGA <span style="text-decoration: underline;">P</span> VTVSS                                                                                                       |
| <b>NM1228</b>          | DVQLVESGGGLV <span style="text-decoration: underline;">R</span> PG <span style="text-decoration: underline;">S</span> LR <span style="text-decoration: underline;">L</span> SC <span style="text-decoration: underline;">E</span> SSGRHFDIDTMGWYRQAPGKQREL <span style="text-decoration: underline;">V</span> ASITSEKSTVYADALK<br>GRFTISR <span style="text-decoration: underline;">D</span> IP <span style="text-decoration: underline;">D</span> NNVYLQMN <span style="text-decoration: underline;">N</span> LKPEDTAVYYCNAKMDPHSLDYALGNQVFWGQGS <span style="text-decoration: underline;">L</span> VTVSS |
| <b>NM1229</b>          | EVQLQESGGGLVQP <span style="text-decoration: underline;">G</span> ESLRLSCAASGRTHDWYTMGWFRQAPGKEREFVARINWSSG <span style="text-decoration: underline;">M</span> TTYAD<br>SVKGRFTISR <span style="text-decoration: underline;">D</span> NP <span style="text-decoration: underline;">K</span> NTVYLQMN <span style="text-decoration: underline;">S</span> LTPDDTAVYYCNVHPFTSPDYWGQGT <span style="text-decoration: underline;">R</span> VTVSS                                                                                                                                                                |
| <b>NM1230</b>          | QVQLVESGGGLV <span style="text-decoration: underline;">R</span> PG <span style="text-decoration: underline;">S</span> LR <span style="text-decoration: underline;">L</span> SCVGS <span style="text-decoration: underline;">G</span> FTFSGYAMNWYRQAPGKALELVAGISNAGDLTHYEEP<br>MKGRVAISR <span style="text-decoration: underline;">A</span> NDKNTVYLQMD <span style="text-decoration: underline;">L</span> KPEDTAVYRCHAPGVRV <span style="text-decoration: underline;">G</span> TGERKDVWGQGAQVTVSS                                                                                                          |

179

180 **Appendix Table S2 – Data collection and refinement statistics for the RBD:NM1226 and**  
 181 **RBD:NM1230 complex structures.**

182 Values in parentheses are for the highest resolution shell.

|                                                | <b>RBD:NM1226 complex<br/>(PDB: 7NKT)</b> | <b>RBD:NM1230 complex<br/>(PDB: 7B27)</b> |
|------------------------------------------------|-------------------------------------------|-------------------------------------------|
| <b>Resolution (Å)</b>                          | 46.1-2.3 (2.44-2.30)                      | 46.5-2.90 (2.98-2.90)                     |
| <b>Space group</b>                             | I4 <sub>1</sub>                           | P4 <sub>3</sub> 2 <sub>1</sub> 2          |
| <b>Unit cell</b>                               |                                           |                                           |
| <b>a, c (Å)</b>                                | 128.09, 77.68                             | 63.29, 411.91                             |
| <b>No of reflections</b>                       | 255015 (38715)                            | 112109 (8061)                             |
| <b>unique reflections</b>                      | 28115 (4500)                              | 18493 (1340)                              |
| <b>Redundancy</b>                              | 9.07                                      | 6.06                                      |
| <b>Completeness (%)</b>                        | 99.9 (99.6)                               | 93.5 (95.7)                               |
| <b>I/σ (I)</b>                                 | 19.5 (1.42)                               | 7.8 (1.15)                                |
| <b>CC1/2</b>                                   | 99.9 (48.4)                               | 99.8 (66.2)                               |
| <b>Wilson B (Å<sup>2</sup>)</b>                | 57                                        | 61                                        |
| <b>R<sub>meas</sub> (%)</b>                    | 9.5 (156.8)                               | 20.7 (186.2)                              |
| <b>R<sub>work</sub> / R<sub>free</sub> (%)</b> | 18.4 / 22.4                               | 26.6 / 30.5                               |
| <b>Rmsd</b>                                    |                                           |                                           |
| <b>Bond angle (°)</b>                          | 1.45                                      | 1.21                                      |
| <b>Bond length (Å)</b>                         | 0.011                                     | 0.016                                     |
| <b>Average B-Factor (Å<sup>2</sup>)</b>        |                                           |                                           |
| <b>RBD (chain A/B)</b>                         | 61.7                                      | 74.6 / 75.2                               |
| <b>NM1230 (chain C/D)</b>                      |                                           | 64.5 / 81.2                               |
| <b>NM1226(chain B)</b>                         | 70.7                                      |                                           |
| <b>water</b>                                   | 55.5                                      |                                           |
| <b>Ramachandran</b>                            |                                           |                                           |
| <b>Favoured (%)</b>                            | 97.0                                      | 86.3                                      |
| <b>Outlier (%)</b>                             | 0.3                                       | 3.9                                       |

183

184



185 **Appendix Table S3 - NeurobodyPlex data illustrated in Fig 5B, C.**

186 Values as MFI and MFI (% control).

| <b># 225</b>              |                   |        |                    |           |                       |         |                     |
|---------------------------|-------------------|--------|--------------------|-----------|-----------------------|---------|---------------------|
|                           | Conc. NM1267 [nM] | MFI S1 | MFI S1 (% control) | MFI Spike | MFI Spike (% control) | MFI RBD | MFI RBD (% control) |
| NM1267                    | 1000.00           | 4453   | 49.58              | 26793     | 69.78                 | 103     | 0.49                |
|                           | 250.00            | 4425   | 49.27              | 26898     | 70.05                 | 162     | 0.77                |
|                           | 62.50             | 4377   | 48.74              | 26219     | 68.28                 | 336     | 1.60                |
|                           | 15.63             | 4423   | 49.24              | 26126     | 68.04                 | 1043    | 4.95                |
|                           | 3.91              | 4769   | 53.10              | 27975     | 72.85                 | 3717    | 17.66               |
|                           | 0.98              | 5304   | 59.06              | 28713     | 74.78                 | 9823    | 46.66               |
|                           | 0.24              | 6556   | 73.00              | 34834     | 90.72                 | 16580   | 78.76               |
|                           | 0.06              | 8069   | 89.84              | 37128     | 96.69                 | 19723   | 93.69               |
| Control n=2 (Serum 1:400) | -                 | 9076   |                    | 38978     |                       | 21104   |                     |
|                           | -                 | 8886   |                    | 37819     |                       | 20999   |                     |
| <b># 289</b>              |                   |        |                    |           |                       |         |                     |
|                           | Conc. NM1267 [nM] | MFI S1 | MFI S1 (% control) | MFI Spike | MFI Spike (% control) | MFI RBD | MFI RBD (% control) |
| NM1267                    | 1000.00           | 503.0  | 15.31              | 15943     | 69.07                 | 258     | 2.29                |
|                           | 250.00            | 512.0  | 15.58              | 16250     | 70.40                 | 291     | 2.59                |
|                           | 62.50             | 527.5  | 16.05              | 16316     | 70.69                 | 349     | 3.10                |
|                           | 15.63             | 547.0  | 16.65              | 16319     | 70.70                 | 639     | 5.68                |
|                           | 3.91              | 641.0  | 19.51              | 16263     | 70.46                 | 1667    | 14.82               |
|                           | 0.98              | 908.0  | 27.63              | 17369     | 75.25                 | 4753    | 42.26               |
|                           | 0.24              | 1630.5 | 49.62              | 21303     | 92.29                 | 8985    | 79.89               |
|                           | 0.06              | 2713.0 | 82.56              | 23808     | 103.15                | 11377   | 100.00              |
| Control n=2 (Serum 1:400) | -                 | 3320.0 |                    | 23012     |                       | 11250   |                     |
|                           | -                 | 3252.5 |                    | 23152     |                       | 11244   |                     |
| <b># 265</b>              |                   |        |                    |           |                       |         |                     |
|                           | Conc. NM1267 [nM] | MFI S1 | MFI S1 (% control) | MFI Spike | MFI Spike (% control) | MFI RBD | MFI RBD (% control) |
| NM1267                    | 1000.00           | 1217   | 47.00              | 14574     | 73.63                 | 93      | 1.36                |
|                           | 250.00            | 1264   | 48.81              | 15273     | 77.16                 | 118     | 1.74                |
|                           | 62.50             | 1230   | 47.50              | 14896     | 75.26                 | 174     | 2.56                |
|                           | 15.63             | 1255   | 48.48              | 14788     | 74.71                 | 351     | 5.18                |
|                           | 3.91              | 1310   | 50.61              | 14993     | 75.75                 | 947     | 13.96               |
|                           | 0.98              | 1549   | 59.84              | 15985     | 80.76                 | 2535    | 37.38               |
|                           | 0.24              | 1881   | 72.65              | 17932     | 90.60                 | 4648    | 68.52               |
|                           | 0.06              | 2225   | 85.96              | 19524     | 98.64                 | 6147    | 90.63               |
| Control n=2 (Serum 1:400) | -                 | 2567   |                    | 19781     |                       | 6666    |                     |
|                           | -                 | 2610   |                    | 19805     |                       | 6899    |                     |

187

188

**# 272**

|                              | Conc.<br>NM1267<br>[nM] | MFI S1 | MFI S1<br>(% control) | MFI<br>Spike | MFI Spike<br>(% control) | MFI<br>RBD | MFI RBD<br>(% control) |
|------------------------------|-------------------------|--------|-----------------------|--------------|--------------------------|------------|------------------------|
| NM1267                       | 1000.00                 | 159    | 25.37                 | 15289        | 86.71                    | 48         | 2.05                   |
|                              | 250.00                  | 163    | 25.93                 | 14686        | 83.29                    | 53         | 2.24                   |
|                              | 62.50                   | 153    | 24.41                 | 14857        | 84.26                    | 65         | 2.77                   |
|                              | 15.63                   | 163    | 26.01                 | 14923        | 84.63                    | 116        | 4.95                   |
|                              | 3.91                    | 192    | 30.63                 | 14895        | 84.47                    | 321        | 13.70                  |
|                              | 0.98                    | 237    | 37.73                 | 15036        | 85.27                    | 853        | 36.40                  |
|                              | 0.24                    | 335    | 53.45                 | 16833        | 95.47                    | 1647       | 70.28                  |
|                              | 0.06                    | 531    | 84.72                 | 17305        | 98.14                    | 2165       | 92.38                  |
| Control n=2<br>(Serum 1:400) | -                       | 611    |                       | 17575        |                          | 2329       |                        |
|                              | -                       | 643    |                       | 17690        |                          | 2359       |                        |

**# 159**

|                              | Conc.<br>NM1267<br>[nM] | MFI S1 | MFI S1<br>(% control) | MFI<br>Spike | MFI Spike<br>(% control) | MFI<br>RBD | MFI RBD<br>(% control) |
|------------------------------|-------------------------|--------|-----------------------|--------------|--------------------------|------------|------------------------|
| NM1267                       | 1000.00                 | 96     | 49.61                 | 12792        | 99.38                    | 37         | 5.07                   |
|                              | 250.00                  | 87     | 45.19                 | 11708        | 90.96                    | 37         | 5.00                   |
|                              | 62.50                   | 90     | 46.75                 | 11503        | 89.36                    | 43         | 5.83                   |
|                              | 15.63                   | 79     | 41.04                 | 11340        | 88.10                    | 51         | 6.99                   |
|                              | 3.91                    | 82     | 42.60                 | 11263        | 87.50                    | 92         | 12.54                  |
|                              | 0.98                    | 86     | 44.68                 | 11437        | 88.85                    | 257        | 35.23                  |
|                              | 0.24                    | 117    | 60.78                 | 12483        | 96.98                    | 531        | 72.79                  |
|                              | 0.06                    | 166    | 85.97                 | 13044        | 100.00                   | 681        | 93.28                  |
| Control n=2<br>(Serum 1:400) | -                       | 191    |                       | 13077        |                          | 758        |                        |
|                              | -                       | 194    |                       | 12668        |                          | 702        |                        |

190 **Appendix Table S4 - Data of control samples (C1-C4) from healthy donors tested in the**  
 191 **NeutrobodyPlex and viral infection assay.**

| <b>NeutrobodyPlex</b> |           |                     |           |                     |           |                     |           |                     |
|-----------------------|-----------|---------------------|-----------|---------------------|-----------|---------------------|-----------|---------------------|
|                       | <b>C1</b> |                     | <b>C2</b> |                     | <b>C3</b> |                     | <b>C4</b> |                     |
|                       | MFI RBD   | MFI RBD (% control) | MFI RBD   | MFI RBD (% control) | MFI RBD   | MFI RBD (% control) | MFI RBD   | MFI RBD (% control) |
| 1 $\mu$ M NM1267      | 83        | 80.58               | 71        | 89.87               | 73        | 72.28               | 49        | 76.56               |
| 1 nM NM1267           | 103       | 100.00              | 103       | 100.00              | 89        | 88.12               | 80        | 100.00              |
| Serum only            | 103       | 100.00              | 79        | 100.00              | 101       | 100.00              | 64        | 100.00              |

192

| <b>Viral Infection Assay</b> |                    |           |           |           |
|------------------------------|--------------------|-----------|-----------|-----------|
| <b>Serum Dilution</b>        | <b>% Infection</b> |           |           |           |
|                              | <b>C1</b>          | <b>C2</b> | <b>C3</b> | <b>C4</b> |
| 1:40                         | 100.00             | 100.00    | 55.56     | 91.54     |
| 1:80                         | 98.24              | 100.00    | 95.44     | 94.69     |
| 1:160                        | 100.00             | 100.00    | 100.00    | 98.45     |
| 1:320                        | 100.00             | 100.00    | 100.00    | 96.90     |
| 1:640                        | 84.62              | 100.00    | 100.00    | 100.67    |
| 1:1280                       | 95.77              | 91.11     | 99.26     | 70.12     |
| 1:2560                       | 93.01              | 75.81     | 95.86     | 85.80     |
| 1:5120                       | 83.85              | 94.74     | 94.39     | 100.00    |

193

194 **References**

195 Chi X, Yan R, Zhang J, Zhang G, Zhang Y, Hao M, Zhang Z, Fan P, Dong Y, Yang Y *et al*  
196 (2020) A neutralizing human antibody binds to the N-terminal domain of the Spike protein of  
197 SARS-CoV-2. *Science* 369: 650-655

198 Hanke L, Vidakovics Perez L, Sheward DJ, Das H, Schulte T, Moliner-Morro A, Corcoran M,  
199 Achour A, Karlsson Hedestam GB, Hallberg BM *et al* (2020) An alpaca nanobody neutralizes  
200 SARS-CoV-2 by blocking receptor interaction. *Nat Commun* 11: 4420

201 Hansen J, Baum A, Pascal KE, Russo V, Giordano S, Wloga E, Fulton BO, Yan Y, Koon K,  
202 Patel K *et al* (2020) Studies in humanized mice and convalescent humans yield a SARS-  
203 CoV-2 antibody cocktail. *Science* 369: 1010-1014

204
